# Supplementary material for: Evaluation of swabs from 15 commercially available oral fluid sample collection devices for the analysis of commonly abused substances: doping agents and drugs of abuse
Source: Royal Society of Chemistry journal article supplement (doi:10.1039/d0an01379j), 2020-01-01
Supplement: d0an01379j1.pdf [file d0an01379j1.pdf]

**List of contents:**

**Tab. A1** Detailed list and classification of analysed substances.

**Tab. A2** List of selected MS/MS parameters for the analytes.

**Tab. A1** Detailed list and classification of analysed substances.

| substance                                                         | drug of abuse | therapeutic drug | doping agent (WADA class)*                                           | analytical standard supplier |
|-------------------------------------------------------------------|---------------|------------------|----------------------------------------------------------------------|------------------------------|
| (+/-)-amphetamine                                                 | ✓             | ✓                | S6 stimulants                                                        | LGC                          |
| (+/-)-methamphetamine                                             | ✓             | ✗                | S6 stimulants                                                        | LGC                          |
| (+/-)-3,4-methylenedioxymethamphetamine (MDMA)                    | ✓             | ✗                | S6 stimulants                                                        | LGC                          |
| methylhexanamine (4-methylhexan-2-amine, DMAA)                    | ✗             | ✗                | S6 stimulants                                                        | Sigma                        |
| cocaine                                                           | ✓             | ✓                | S6 stimulants                                                        | LGC                          |
| methylphenidate                                                   | ✓             | ✓                | S6 stimulants                                                        | LGC                          |
| nikethamide (N,N-diethylnicotinamide)                             | ✗             | ✓                | S6 stimulants                                                        | Aldrich                      |
| strychnine                                                        | ✗             | ✗                | S6 stimulants                                                        | Sigma                        |
| (-)- $\Delta^9$ -tetrahydrocannabinol (THC)                       | ✓             | ✓                | S8 cannabinoids                                                      | LGC                          |
| (-)-11-nor-9-carboxy- $\Delta^9$ -tetrahydrocannabinol (THC-COOH) | ✗             | ✗                | S8 cannabinoids                                                      | LGC                          |
| morphine                                                          | ✓             | ✓                | S7 narcotics                                                         | LGC                          |
| heroin (diacetylmorphine)                                         | ✓             | ✓                | S7 narcotics                                                         | LGC                          |
| hydrocodone                                                       | ✓             | ✓                | ✗                                                                    | Cerillant®                   |
| oxycodone                                                         | ✓             | ✓                | S7 narcotics                                                         | LGC                          |
| (+/-)-methadone                                                   | ✓             | ✓                | S7 narcotics                                                         | Cerillant®                   |
| buprenorphine                                                     | ✓             | ✓                | S7 narcotics                                                         | Cerillant®                   |
| fentanyl                                                          | ✓             | ✓                | S7 narcotics                                                         | LGC                          |
| ketamine                                                          | ✓             | ✓                | ✗                                                                    | LGC                          |
| phencyclidine (PCP)                                               | ✓             | ✗                | S0 non-approved substances                                           | LGC                          |
| lysergic acid diethylamide (LSD)                                  | ✓             | ✗                | S0 non-approved substances                                           | LGC                          |
| psilocybin                                                        | ✓             | ✗                | S0 non-approved substances                                           | Cerillant®                   |
| alprazolam                                                        | ✓             | ✓                | ✗                                                                    | LGC                          |
| clonazepam                                                        | ✓             | ✓                | ✗                                                                    | Cerillant®                   |
| flunitrazepam                                                     | ✓             | ✓                | ✗                                                                    | LGC                          |
| zolpidem                                                          | ✓             | ✓                | ✗                                                                    | LGC                          |
| boldenone ( $\Delta^1$ -testosterone / 1-dehydrotestosterone)     | ✗             | ✓                | S1 anabolic agents                                                   | VETRANAL™<br>(Sigma-Aldrich) |
| methandienone (methandrostenolone)                                | ✗             | ✓                | S1 anabolic agents                                                   | Cerillant®                   |
| nandrolone (19-nortestosterone)                                   | ✗             | ✓                | S1 anabolic agents                                                   | LGC                          |
| stanozolol                                                        | ✗             | ✓                | S1 anabolic agents                                                   | LGC                          |
| clenbuterol                                                       | ✗             | ✓                | S1 anabolic agents                                                   | LGC                          |
| ibutamoren (MK-677)                                               | ✗             | ✗                | S2 peptide hormones, growth factors, related substances and mimetics | Cayman Chemicals             |
| fenoterol                                                         | ✗             | ✓                | S3 beta-2 agonists                                                   | LGC                          |
| salbutamol (albuterol)                                            | ✗             | ✓                | S3 beta-2 agonists                                                   | LGC                          |
| terbutaline                                                       | ✗             | ✓                | S3 beta-2 agonists                                                   | LGC                          |
| anastrozole                                                       | ✗             | ✓                | S4 hormone and metabolic modulators                                  | LGC                          |
| meldonium                                                         | ✗             | ✓                | S4 hormone and metabolic modulators                                  | EDQM                         |
| canrenone                                                         | ✗             | ✓                | S5 diuretics and masking agents                                      | Sigma                        |
| chlorothiazide                                                    | ✗             | ✓                | S5 diuretics and masking agents                                      | Sigma-Aldrich                |
| hydrochlorothiazide                                               | ✗             | ✓                | S5 diuretics and masking agents                                      | LGC                          |
| furosemide                                                        | ✗             | ✓                | S5 diuretics and masking agents                                      | Sigma                        |
| betamethasone                                                     | ✗             | ✓                | S9 glucocorticoids                                                   | LGC                          |
| prednisolone                                                      | ✗             | ✓                | S9 glucocorticoids                                                   | Sigma                        |
| prednisone                                                        | ✗             | ✓                | S9 glucocorticoids                                                   | Sigma                        |
| atenolol                                                          | ✗             | ✓                | P1 beta-blockers                                                     | LGC                          |
| bisoprolol                                                        | ✗             | ✓                | P1 beta-blockers                                                     | LGC                          |
| carteolol                                                         | ✗             | ✓                | P1 beta-blockers                                                     | USP                          |
| metoprolol                                                        | ✗             | ✓                | P1 beta-blockers                                                     | LGC                          |
| nebivolol                                                         | ✗             | ✓                | P1 beta-blockers                                                     | Sigma                        |
| propranolol                                                       | ✗             | ✓                | P1 beta-blockers                                                     | LGC                          |

\*according to 2020 Prohibited List. (<https://www.wada-ama.org/en/resources/science-medicine/prohibited-list-documents>, WADA 2019)

**Tab. A2** List of selected MS/MS parameters for the analytes. Substances arranged by increasing retention time.

| substance           | precursor ion [m/z] | product ions [m/z] |        |              | retention time [min] |
|---------------------|---------------------|--------------------|--------|--------------|----------------------|
|                     |                     | quantifier         |        | qualifier(s) |                      |
| meldonium           | 147.00              | 58.10              | 59.15  | -            | 1.499                |
| psilocybin          | 284.90              | 58.10              | 205.20 | 240.05       | 2.433                |
| morphine            | 286.10              | 152.10             | 201.15 | 165.10       | 2.642                |
| salbutamol          | 240.00              | 148.10             | 222.25 | 166.20       | 2.913                |
| terbutaline         | 226.00              | 152.10             | 107.05 | 125.10       | 3.015                |
| atenolol            | 267.00              | 145.10             | 190.20 | 74.15        | 3.089                |
| fenoterol           | 304.00              | 107.15             | 135.15 | 286.10       | 4.281                |
| nikethamide         | 178.90              | 108.05             | 80.10  | 72.10        | 4.453                |
| carteolol           | 293.00              | 237.15             | 202.15 | 74.10        | 4.548                |
| amphetamine         | 135.90              | 91.10              | 119.15 | 65.10        | 4.625                |
| oxycodone           | 316.10              | 298.20             | 241.20 | 256.10       | 4.629                |
| hydrocodone         | 300.00              | 199.15             | 171.10 | 128.15       | 4.928                |
| methamphetamine     | 150.00              | 91.10              | 65.10  | 119.20       | 5.001                |
| chlorothiazide      | 294.00*             | 214.05             | 179.10 | 215.10       | 5.012                |
| methylhexanamine    | 116.20              | 57.10              | 41.10  | -            | 5.115                |
| MDMA                | 194.00              | 163.10             | 105.10 | 133.10       | 5.185                |
| strychnine          | 334.90              | 184.10             | 156.20 | 129.15       | 5.330                |
| hydrochlorothiazide | 296.00*             | 269.00             | 205.10 | 77.95        | 5.421                |
| ketamine            | 237.90              | 125.05             | 220.10 | 207.15       | 5.665                |
| metoprolol          | 267.90              | 116.15             | 74.15  | 72.10        | 6.407                |
| clenbuterol         | 277.10              | 203.05             | 132.10 | 168.15       | 6.531                |
| methylphenidate     | 234.00              | 84.15              | 56.10  | 91.10        | 6.650                |
| heroin              | 370.10              | 165.15             | 268.20 | 211.10       | 6.866                |
| cocaine             | 303.90              | 182.20             | 82.10  | 105.10       | 7.348                |
| zolpidem            | 307.90              | 235.15             | 236.20 | 263.20       | 7.383                |
| LSD                 | 323.90              | 223.20             | 208.15 | 207.10       | 7.688                |
| bisoprolol          | 326.20              | 116.20             | 74.05  | 72.10        | 7.869                |
| phencyclidine       | 244.00              | 91.05              | 86.10  | 159.20       | 8.607                |
| propranolol         | 260.10              | 116.20             | 183.10 | 155.20       | 8.775                |
| fentanyl            | 337.00              | 188.20             | 105.15 | 103.10       | 9.114                |
| prednisolone        | 361.00              | 147.15             | 325.20 | 307.15       | 9.277                |
| prednisone          | 359.00              | 341.35             | 267.30 | -            | 9.409                |
| buprenorphine       | 468.10              | 55.15              | 396.25 | 414.25       | 9.672                |
| ibutamoren          | 529.00              | 267.10             | 91.15  | 263.15       | 10.382               |
| betamethasone       | 393.10              | 373.25             | 355.15 | 279.10       | 10.798               |
| furosemide          | 329.05*             | 284.85             | 205.10 | 126.10       | 11.043               |
| neбиволol           | 406.10              | 151.10             | 123.10 | 103.10       | 11.098               |
| methadone           | 310.00              | 265.15             | 105.10 | 77.05        | 11.322               |
| alprazolam          | 308.90              | 281.15             | 205.15 | 274.10       | 11.393               |
| anastrozole         | 294.00              | 225.20             | 210.20 | 115.05       | 11.412               |
| stanozolol          | 329.10              | 81.15              | 95.15  | 121.10       | 11.496               |
| boldenone           | 287.00              | 121.20             | 135.20 | 77.15        | 11.942               |
| clonazepam          | 316.00              | 270.10             | 214.05 | 207.15       | 11.970               |
| nandrolone          | 275.10              | 109.10             | 239.10 | 257.30       | 12.320               |
| methandienone       | 301.20              | 121.05             | 149.25 | 77.00        | 12.582               |
| flunitrazepam       | 313.90              | 268.15             | 239.10 | 183.10       | 12.750               |
| canrenone           | 341.00              | 107.15             | 187.25 | 235.15       | 15.029               |
| THC-COOH            | 345.00              | 327.10             | 299.25 | 193.30       | 19.874               |
| THC                 | 315.00              | 193.10             | 123.10 | 259.15       | 24.788               |

\*negative ionization mode
