# Supplementary material for: Evaluation of swabs from 15 commercially available oral fluid sample collection devices for the analysis of commonly abused substances: doping agents and drugs of abuse
Source: Royal Society of Chemistry journal article supplement (doi:10.1039/d0an01379j), 2020-01-01
Supplement: d0an01379j2.pdf [file d0an01379j2.pdf]

**List of contents:**

**Tab. B1** Drug recoveries from laboratory plastics.

**Tab. B2** Drug recoveries from oral fluid sample collection device swabs.

**Tab. B3** Matrix effects presented as percentage of signals measured from spiked matrix from oral fluid sample collection device swabs relative to signals from spiked neat matrix.

**Tab. B4** Drug recoveries from oral fluid sample collection device swabs and presumptive drug recovery correction values.

**Tab. B5** Drug recoveries [%] from Sarstedt Salivette® swabs – comparison of results recorded from spiked oral fluid (n=3) and spiked ultrapure water (n=4). Relative standard deviations (RSDs) [%] given in brackets.

**Tab. B1** Drug recoveries [%] from laboratory plastics. Relative standard deviations (RSDs) [%] given in brackets, drugs arranged by increasing retention time, n=4.

| substance           | 15 mL<br>Falcon tube | 5 mL<br>syringe | 10 mL<br>syringe | 2 mL<br>Eppendorf tube |
|---------------------|----------------------|-----------------|------------------|------------------------|
| meldonium           | 92.4 (3.8)           | 99.6 (0.7)      | 100.3 (1.0)      | 100.6 (1.3)            |
| psilocybin          | 98.5 (1.1)           | 99.2 (0.6)      | 100.8 (0.8)      | 99.1 (1.2)             |
| morphine            | 110.8 (3.2)          | 101.7 (2.9)     | 105.6 (2.5)      | 100.5 (2.3)            |
| salbutamol          | 103.2 (0.7)          | 100.3 (1.1)     | 101.5 (1.2)      | 99.7 (1.4)             |
| terbutaline         | 105.3 (1.5)          | 101.2 (1.5)     | 100.5 (1.2)      | 100.3 (0.7)            |
| atenolol            | 97.3 (8.6)           | 97.4 (7.6)      | 102.5 (3.8)      | 110.0 (6.7)            |
| fenoterol           | 108.8 (1.7)          | 99.4 (1.4)      | 97.6 (0.8)       | 99.3 (0.8)             |
| nikethamide         | 103.0 (1.0)          | 99.6 (1.7)      | 99.8 (0.9)       | 100.7 (0.9)            |
| carteolol           | 96.3 (9.2)           | 98.1 (9.1)      | 104.2 (3.5)      | 110.3 (7.5)            |
| oxycodone           | 101.3 (11.4)         | 97.9 (9.0)      | 102.3 (2.4)      | 117.3 (9.7)            |
| amphetamine         | 101.9 (3.5)          | 101.1 (4.5)     | 104.2 (3.8)      | 103.0 (5.0)            |
| chlorothiazide      | 99.5 (0.8)           | 100.2 (0.7)     | 102.1 (0.9)      | 98.6 (0.9)             |
| hydrocodone         | 114.5 (16.7)         | 101.5 (12.8)    | 106.3 (6.5)      | 118.7 (13.1)           |
| methamphetamine     | 96.5 (12.2)          | 101.6 (9.9)     | 105.7 (7.3)      | 113.1 (11.6)           |
| methylhexanamine    | 101.6 (5.8)          | 101.9 (5.7)     | 104.1 (4.3)      | 104.1 (7.1)            |
| MDMA                | 94.3 (11.7)          | 101.2 (10.7)    | 103.4 (7.0)      | 114.9 (12.9)           |
| hydrochlorothiazide | 100.7 (3.1)          | 100.8 (4.3)     | 103.4 (3.7)      | 99.7 (1.8)             |
| strychnine          | 111.6 (22.4)         | 100.9 (13.2)    | 104.8 (7.4)      | 122.7 (18.3)           |
| ketamine            | 105.6 (2.7)          | 100.3 (2.4)     | 103.3 (0.8)      | 100.4 (2.6)            |
| metoprolol          | 96.4 (10.4)          | 97.3 (9.1)      | 103.0 (4.7)      | 111.4 (10.6)           |
| clenbuterol         | 97.2 (7.5)           | 98.0 (6.3)      | 104.1 (2.6)      | 107.1 (7.3)            |
| methylphenidate     | 173.3 (4.7)          | 97.4 (5.0)      | 105.6 (4.6)      | 100.6 (4.9)            |
| heroin              | 127.2 (2.5)          | 99.9 (3.5)      | 108.9 (2.0)      | 102.8 (2.1)            |
| zolpidem            | 104.0 (2.0)          | 100.7 (2.2)     | 102.9 (1.5)      | 101.2 (1.9)            |
| cocaine             | 117.0 (21.0)         | 99.7 (16.6)     | 103.9 (8.6)      | 121.7 (19.3)           |
| LSD                 | 103.2 (1.4)          | 99.6 (1.1)      | 101.0 (1.0)      | 100.2 (1.2)            |
| bisoprolol          | 89.2 (15.9)          | 94.5 (11.0)     | 100.5 (2.7)      | 115.9 (13.7)           |
| phencyclidine       | 76.1 (20.2)          | 91.8 (10.7)     | 92.6 (3.5)       | 123.9 (23.4)           |
| propranolol         | 102.8 (5.2)          | 100.1 (6.0)     | 103.1 (3.6)      | 105.3 (6.0)            |
| prednisolone        | 98.7 (0.9)           | 97.7 (3.1)      | 97.9 (1.3)       | 98.7 (3.2)             |
| fentanyl            | 105.5 (20.2)         | 101.3 (15.8)    | 108.4 (5.8)      | 121.6 (14.8)           |
| prednisone          | 96.5 (1.0)           | 101.1 (4.3)     | 99.0 (1.1)       | 101.5 (2.5)            |
| buprenorphine       | 106.4 (4.5)          | 99.2 (5.0)      | 105.6 (3.5)      | 110.6 (4.5)            |
| ibutamoren          | 115.4 (0.7)          | 104.0 (5.0)     | 109.1 (3.9)      | 107.2 (4.4)            |
| betamethasone       | 89.2 (2.3)           | 95.7 (3.8)      | 101.0 (3.0)      | 98.7 (4.7)             |
| furosemide          | 94.9 (0.5)           | 97.8 (1.3)      | 101.4 (2.2)      | 98.7 (1.8)             |
| neбиволol           | 118.0 (2.1)          | 99.1 (4.1)      | 104.4 (4.0)      | 103.3 (7.0)            |
| alprazolam          | 98.3 (1.1)           | 100.5 (1.2)     | 100.5 (0.7)      | 101.7 (0.9)            |
| anastrozole         | 100.9 (1.0)          | 100.9 (1.4)     | 101.0 (0.7)      | 100.9 (1.9)            |
| stanozolol          | 61.8 (0.6)           | 94.9 (1.9)      | 96.7 (2.8)       | 99.8 (3.8)             |
| methadone           | 94.8 (12.1)          | 96.4 (10.2)     | 101.3 (3.1)      | 114.2 (17.0)           |
| boldenone           | 92.3 (0.8)           | 98.9 (1.4)      | 99.4 (0.8)       | 100.4 (1.5)            |
| clonazepam          | 99.0 (0.6)           | 99.1 (1.2)      | 100.7 (0.7)      | 100.8 (1.2)            |
| nandrolone          | 92.2 (1.9)           | 98.2 (1.8)      | 98.8 (2.1)       | 99.3 (1.3)             |
| methandienone       | 90.8 (0.5)           | 99.3 (2.1)      | 99.3 (1.2)       | 100.3 (1.5)            |
| flunitrazepam       | 98.0 (1.3)           | 99.7 (1.7)      | 100.6 (1.0)      | 99.7 (0.8)             |
| canrenone           | 62.1 (2.6)           | 97.8 (2.0)      | 98.9 (1.3)       | 100.5 (2.7)            |
| THC-COOH            | 22.4 (6.4)           | 40.3 (8.7)      | 47.7 (15.3)      | 87.7 (3.8)             |
| THC                 | 20.5 (3.5)           | 23.9 (6.1)      | 24.5 (11.9)      | 41.3 (11.0)            |







**Tab. B5** Drug recoveries [%] from Sarstedt Salivette® swabs – comparison of results recorded from spiked oral fluid (n=3) and spiked ultrapure water (n=4). Relative standard deviations (RSDs) [%] given in brackets.

| substance        | spiked oral fluid | spiked ultrapure water |
|------------------|-------------------|------------------------|
| morphine         | 89.2 (7.4)        | 99.4 (4.7)             |
| salbutamol       | 87.1 (23.9)       | 81.2 (2.8)             |
| terbutaline      | 85.2 (12.1)       | 55.0 (1.9)             |
| atenolol         | 84.2 (23.7)       | 119.4 (3.6)            |
| fenoterol        | 65.1 (11.2)       | 35.0 (5.9)             |
| nikethamide      | 85.6 (12.1)       | 69.3 (1.8)             |
| carteolol        | 66.3 (6.3)        | 60.1 (4.3)             |
| oxycodone        | 63.7 (4.6)        | 79.2 (2.8)             |
| amphetamine      | 78.8 (4.6)        | 71.8 (5.7)             |
| chlorothiazide   | 108.1 (30.7)      | 120.8 (2.7)            |
| hydrocodone      | 66.9 (7.5)        | 90.6 (2.8)             |
| methamphetamine  | 74.1 (6.1)        | 110.3 (3.5)            |
| methylhexanamine | 91.7 (14.7)       | 94.0 (3.8)             |
| MDMA             | 70.5 (2.6)        | 71.9 (5.6)             |
| strychnine       | 63.2 (13.0)       | 65.3 (8.0)             |
| ketamine         | 73.7 (9.6)        | 53.3 (4.0)             |
| metoprolol       | 68.5 (4.1)        | 66.9 (5.4)             |
| clenbuterol      | 69.3 (6.9)        | 55.6 (6.4)             |
| heroin           | 77.1 (9.0)        | 100.0 (3.2)            |
| zolpidem         | 66.8 (6.6)        | 30.7 (9.1)             |
| cocaine          | 72.1 (5.4)        | 108.1 (9.3)            |
| LSD              | 54.3 (10.5)       | 19.3 (18.4)            |
| propranolol      | 61.9 (7.9)        | 48.9 (11.1)            |
| prednisolone     | 94.7 (5.3)        | 84.4 (4.4)             |
| fentanyl         | 87.4 (8.8)        | 76.1 (6.7)             |
| prednisone       | 94.5 (5.6)        | 95.4 (1.1)             |
| buprenorphine    | 84.4 (7.8)        | 58.0 (6.7)             |
| ibutamoren       | 82.2 (13.0)       | 56.2 (9.8)             |
| betamethasone    | 80.4 (21.7)       | 88.1 (3.4)             |
| furosemide       | 74.4 (21.6)       | 69.2 (4.5)             |
| nebivolol        | 14.3 (29.6)       | 18.9 (10.1)            |
| alprazolam       | 85.7 (4.0)        | 85.3 (4.6)             |
| anastrozole      | 91.5 (12.0)       | 96.8 (7.0)             |
| stanozolol       | 25.7 (25.3)       | 13.9 (9.0)             |
| methadone        | 88.8 (8.9)        | 69.6 (4.2)             |
| boldenone        | 90.3 (7.9)        | 75.6 (5.5)             |
| clonazepam       | 82.4 (7.4)        | 71.7 (4.0)             |
| nandrolone       | 84.7 (10.3)       | 84.5 (3.2)             |
| methandienone    | 95.8 (6.8)        | 77.3 (5.1)             |
| flunitrazepam    | 87.0 (6.6)        | 77.1 (3.7)             |
| canrenone        | 88.2 (8.7)        | 70.4 (3.2)             |
| THC-COOH         | 64.6 (13.4)       | 7.3 (6.8)              |
| THC              | 16.4 (18.7)       | 5.7 (33.8)             |
